# Supplementary material for: Androgen deprivation induces double-null prostate cancer via aberrant nuclear export and ribosomal biogenesis through HGF and Wnt activation
Source: PubMed Central journal article supplement (PMC10858246; doi:10.1038/s41467-024-45489-4), 2024-02-09
Supplement: 41467_2024_45489_MOESM3_ESM.pdf [file 41467_2024_45489_MOESM3_ESM.pdf]

## Description of Additional Supplementary Files

### Title: **Supplementary Data 1**

Description: Related to Fig. 1b and Supplementary Fig. 1b,c; DEGs between DNPC or NEPC versus ARPC

### Title: **Supplementary Data 2**

Description: Related to Fig. 2g-h and Supplementary Fig. 2l; DEG List between *hMETtg+* vs *hMETtg-* in mouse prostate epithelial cells of indicated GEMMs.

### Title: **Supplementary Data 3**

Description: Related to Fig. 4c and Supplementary Fig. 4i; DEG List between *hMETtg+* epithelial cells from *hHGFTg:H11<sup>hMET/+</sup>:Ctnnb1<sup>L(Ex3)/+</sup>:PB<sup>Cre4</sup>* versus those of *hHGFTg:H11<sup>hMET/+</sup>:PB<sup>Cre4</sup>* mice

### Title: **Supplementary Data 4**

Description: Related to Fig. 4j; DEG List between LE2 vs other LE cell clusters from *hHGFTg:H11<sup>hMET/+</sup>:Ctnnb1<sup>L(Ex3)/+</sup>:PB<sup>Cre4</sup>* mice

### Title: **Supplementary Data 5**

Description: Related to Fig. 4j; DEG List between LE3 vs other LE cell clusters from *hHGFTg:H11<sup>hMET/+</sup>:Ctnnb1<sup>L(Ex3)/+</sup>:PB<sup>Cre4</sup>* mice

### Title: **Supplementary Data 6**

Description: Related to Fig. 4j; DEG List between LE4 vs other LE cell clusters from *hHGFTg:H11<sup>hMET/+</sup>:Ctnnb1<sup>L(Ex3)/+</sup>:PB<sup>Cre4</sup>* mice

### Title: **Supplementary Data 7**

Description: Related to RNAseq data in Fig. 7d-e; DEGs list between castrated and intact prostate samples of *hHGFTg:H11<sup>hMET/+</sup>:Ctnnb1<sup>L(Ex3)/+</sup>:PB<sup>Cre4</sup>* mice
